# Supplementary material
Source: PubMed Central journal article supplement (PMC3963572)
Supplement: supp_tpc.113.117838_tpc117838_Supplemental_Data.pdf [file supp_tpc.113.117838_tpc117838_Supplemental_Data.pdf]

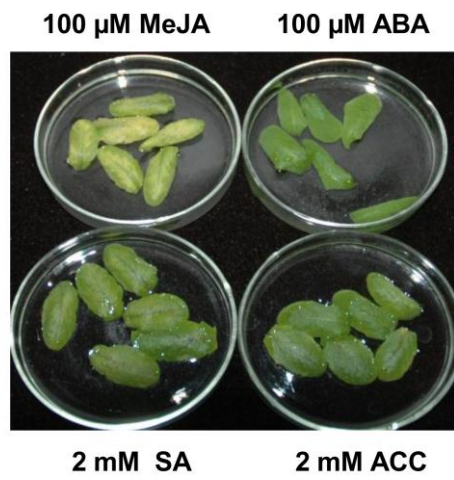

Supplemental Fig. 1 Loss of *WRKY57* function accelerated leaf senescence only induced by exogenous MeJA.

**SEN4 Promoter**

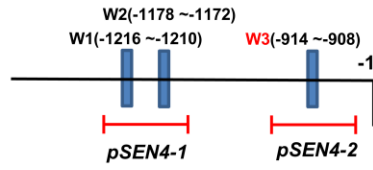

**SAG12 Promoter**

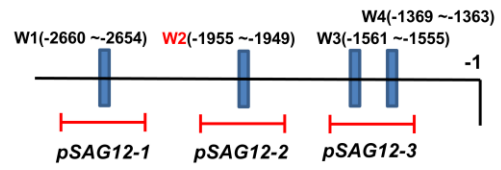

**SAG18 Promoter**

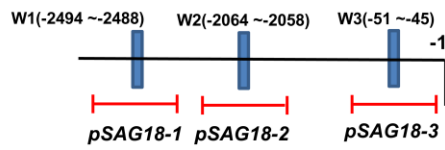

**SAG20 Promoter**

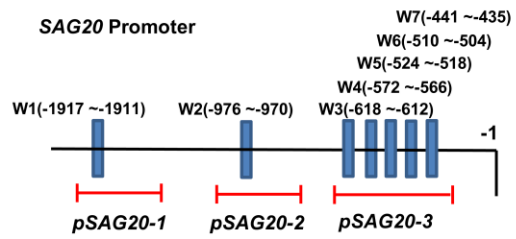

Supplemental Fig. 2 W box information of *SEN4*, *SAG12*, *SAG18* and *SAG20* genes promoter sequences in detail. W1, W2 etc. denote each W box, numbered left to right with sequence sites relative to the start code. Red lines indicate the sequences detected by ChIP assays.

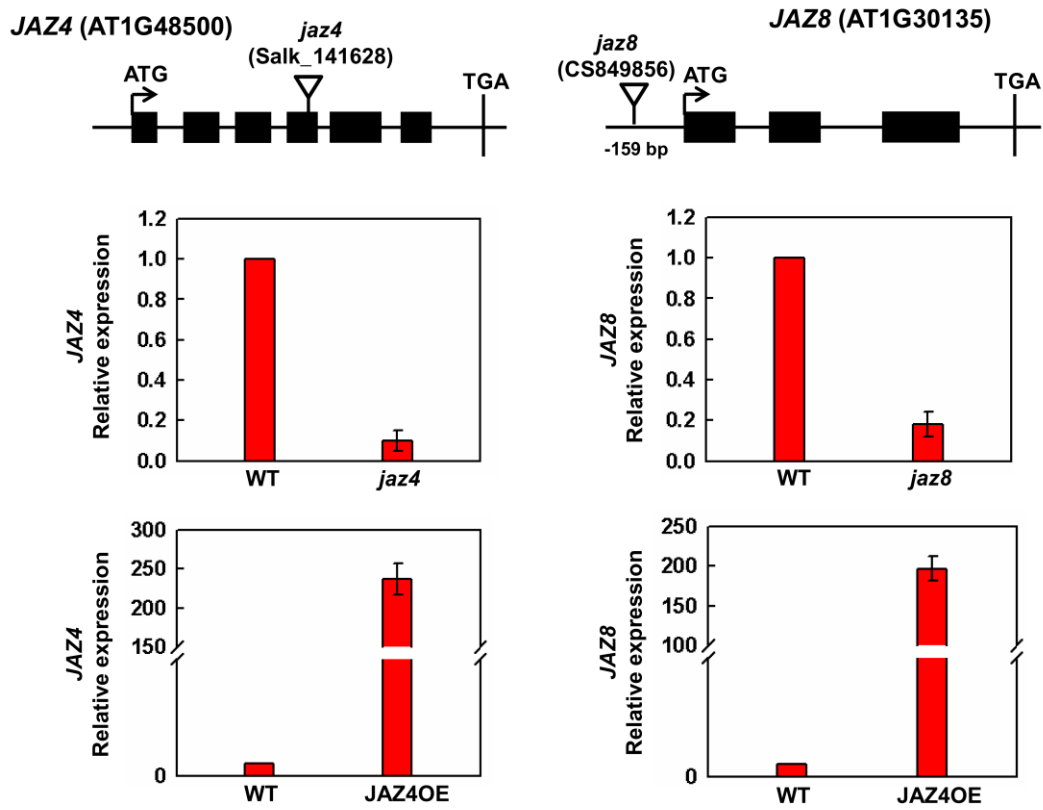

Supplemental Fig. 3 Mutants and overexpression lines screening of *JAZ4* and *JAZ8*.

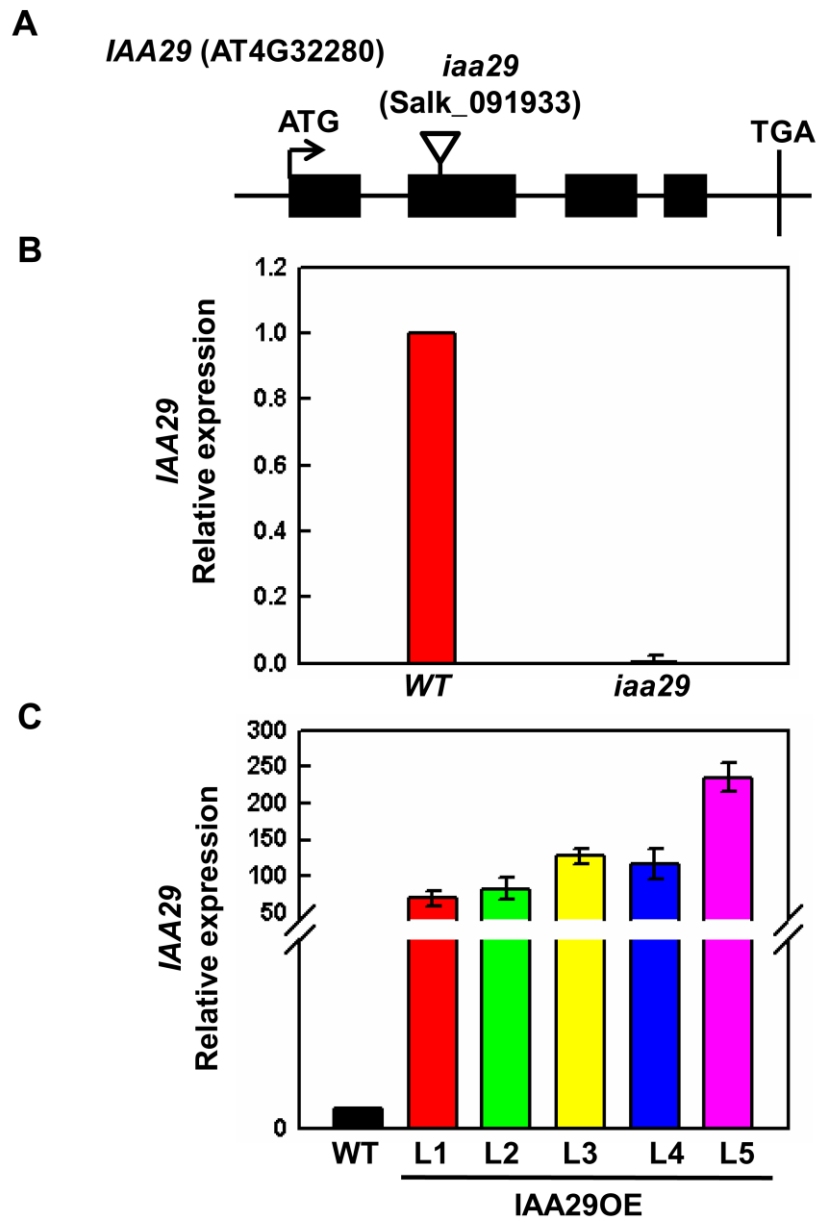

Supplemental Fig. 4 Mutant and overexpression lines screening of *IAA29*.

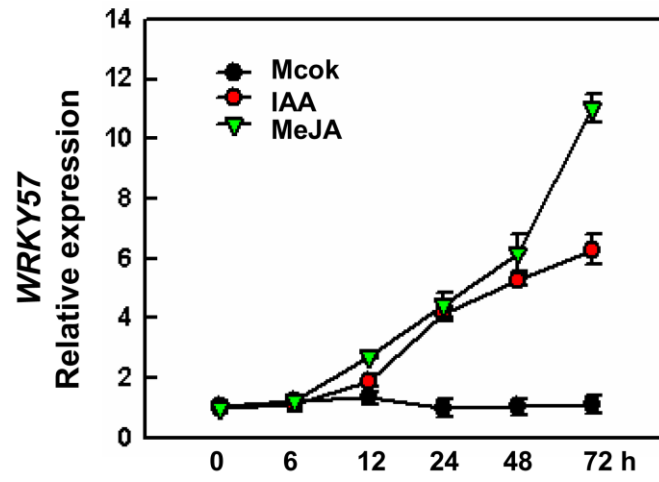

Supplemental Fig. 5 Expression levels of *WRKY57* in *ProWRKY57:Myc-WRKY57* transgenic plants under IAA and MeJA treatments.

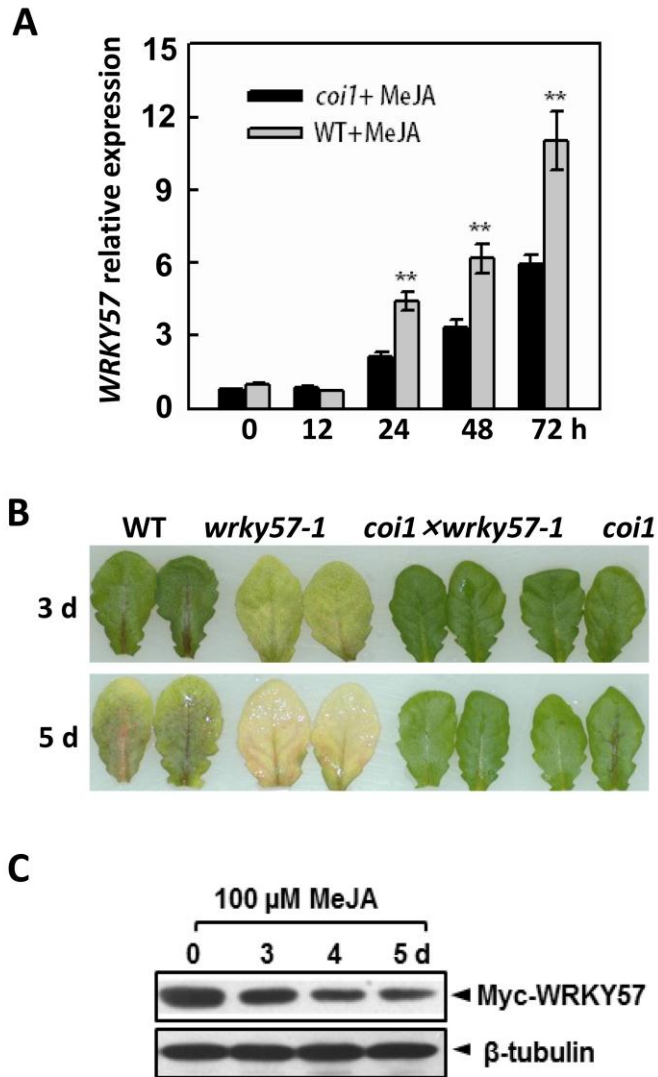

Supplemental Fig. 6 The function of WRKY57 in JA-induced senescence is dependent on COI1,

**Supplemental Table 1. qRT-PCR Primer Sets Used in This Study, Related to Figure 2.**

| Quantitative RT-PCR primers |                            |                        |
|-----------------------------|----------------------------|------------------------|
| Genes                       | Primer sequences (5' → 3') |                        |
|                             | Primer forward             | Primer reverse         |
| <i>WRKY57</i> (AT1G69310)   | CACAAACAGCAGATGCACGG       | CTATGTGGGTCGTGTGCAGT   |
| <i>SEN4</i> (AT4G30270)     | GACTCTTCTCGTGCGGCGT        | CCCACGGCCATTTCCCAAGC   |
| <i>SAG12</i> (AT5G45890)    | GCGTTTTTCAGCGGTTGCGG       | CCGCCTTCGCAGCCAAAATCG  |
| <i>SAG18</i> (AT1G71190)    | GTTTGCAGGTGAGAAAATAGGA     | AGAGTAGCATCGTTGGGTGAAG |
| <i>SAG20</i> (AT3G10985)    | TCGGTAACGTTGTTGCTGGA       | ACCAAACCTTTCAAATCGCCA  |
| <i>JAZ4</i> (AT1G48500)     | CTCGGGCTGGGATCAAAGTT       | ACTGAGGACCAGAACCGACT   |
| <i>JAZ8</i> (AT1G30135)     | CTCAAACGGGTCGGATCCTC       | CGTCGTGAATGGTACGGTGA   |
| <i>IAA29</i> (AT4G32280)    | GCGTTTTGAGGCGACGTTTGGG     | CTTCTTCGTTGGGCTGGCCA   |

**Supplemental Table 2. Primer Sets Used in Yeas-two-hybrid and BiFC Assay, Related to Figure 3 and 7.**

| Yeast-two-hybrid primers |                                    |                                    |
|--------------------------|------------------------------------|------------------------------------|
| Genes                    | Primer sequences (5' → 3')         |                                    |
|                          | Primer forward                     | Primer reverse                     |
| <i>WRKY57</i>            | TATCCATGGACGATCCTGATAATCCCGATCTG   | TATGTCGACTCAAGGGTTGCGCATAGTTTG     |
| <i>IAA29</i>             | TATGAATTCATGGAGTTGGATCTTGGTCATTCTC | TATGGATCCAACGCCTATCCTTAAAACAAACATC |
| <i>JAZ4</i>              | GGGGAATTCTGGAGAGAGATTTCTCGGGCTG    | CCCGGAGCTCTTAGTGAAGATGATGAGCTGGA   |
| <i>JAZ8</i>              | CCCCCCGGGTATGAAGCTACAGCAAATTGT     | GGGGAGCTCTTATCGTCGTGAATGGTACGGTG   |

  

| BiFC primers  |                                    |                                  |
|---------------|------------------------------------|----------------------------------|
| Genes         | Primer sequences (5' → 3')         |                                  |
|               | Primer forward                     | Primer reverse                   |
| <i>WRKY57</i> | TATTCTAGAATGAACGATCCTGATAACCCG     | TATGGATCCAGGTTGCGCATAGTTTGAG     |
| <i>IAA29</i>  | TATGAATTCATGGAGTTGGATCTTGGTCATTCTC | ATATCTGAGAAACAACATCTTGTATATGAACA |
| <i>JAZ4</i>   | CAACATTTAAATATGGAGAGAGATTTCTCGG    | AAATCTAGAGTGCAGATGATGAGCTGG      |
| <i>JAZ8</i>   | AAAATTTAAATATGAAGCTACAGCAAAGTGACT  | AAATCTAGATCGTCGTGAATGGTACGGTG    |
